# Supplementary material for: Transgenic expression of the HERV-W envelope protein leads to polarized glial cell populations and a neurodegenerative environment
Source: PubMed Central journal article supplement (PMC10515160; doi:10.1073/pnas.2308187120), 2023-09-11
Supplement: pnas.2308187120.sapp.pdf [file pnas.2308187120.sapp.pdf]

## Supporting Information for

## Transgenic expression of the HERV-W envelope protein leads to polarized glial cell populations and a neurodegenerative environment

Joel Gruchot<sup>1</sup>, Isabel Lewen<sup>1</sup>, Michael Dietrich<sup>1</sup>, Laura Reiche<sup>1</sup>, Mustafa Sindi<sup>1</sup>, Christina Hecker<sup>1</sup>, Felisa Herrero<sup>2</sup>, Benjamin Charvet<sup>3</sup>, Ulrike Weber-Stadlbauer<sup>2,4</sup>, Hans-Peter Hartung<sup>1,5,6</sup>, Philipp Albrecht<sup>1</sup>, Hervé Perron<sup>3</sup>, Urs Meyer<sup>2,4</sup> and Patrick Küry<sup>1,7\*</sup>

<sup>1</sup> Department of Neurology, Medical Faculty, Heinrich-Heine-University Düsseldorf, 40225 Düsseldorf, Germany.

<sup>2</sup> Institute of Pharmacology and Toxicology, University of Zürich-Vetsuisse, CH-8057 Zürich, Switzerland.

<sup>3</sup> GeNeuro Innovation, 69008 Lyon, France.

<sup>4</sup> Neuroscience Center Zurich, University of Zürich and ETH Zürich, CH-8057 Zürich, Switzerland.

<sup>5</sup> Brain and Mind Center, University of Sydney, Sydney, NSW 2050, Australia.

<sup>6</sup> Department of Neurology, Palacky University Olomouc, 77146 Olomouc, Czech Republic.

<sup>7</sup> Department of Neurology, University of Bern, CH-3010 Bern, Switzerland

\* Correspondence to Prof. Dr. Patrick Küry  
Email: [kuery@uni-duesseldorf.de](mailto:kuery@uni-duesseldorf.de)

### This PDF file includes:

Tables S1 to S2

**Table S1. qPCR primer list**

| <b>Name</b> | <b>Forward sequence</b>        | <b>Reverse sequence</b>         |
|-------------|--------------------------------|---------------------------------|
| HERV-Wenv   | TTT ACT CCT CTT TGG ACC CT     | ATC TGG GGT TCC ATT TGA AG      |
| mC1qA       | GCC TGT GTG CTG ACC ATG AC     | GGGTGC TCG GCA GAC ATC T        |
| mC3         | CCG TGA ACA GGA GGA ACT TAA GG | ATG CTG CAG AAG GCT GGA TT      |
| mCd74       | CCA ACG CGA CCT CAT CTC TAA    | AGG GCG GTT GCC CAG TA          |
| mClec7a     | CCT TGG AGG CCC ATT GC         | GCA ACC ACT ACT ACC ACA AAG CA  |
| mGapdh      | AGG TTG TCT CCT GCG ACT TCA    | CCA GGA AAT GAG CTT GAC AAA G   |
| mLcn2       | CCC TGT ATG GAA GAA CCA AGG A  | GCA AAG CGG GTG AAA CGT T       |
| rC3         | GGT CTG CGG AAG TGT TGT GA     | GGC GCT GGC AGC TGT ACT         |
| rCcl5       | CCA ACC TTG CAG TCG TCT TTG    | TCT GGG TTG GCA CAC ACT TG      |
| rCcl6       | CAA TTA CCT GGG ATT CCC GG     | TGG GAA TGC CTC ATT TGC AT      |
| rCsf1       | CGA GGT GTC GGA GCA CTG TA     | TCA ACT GCT GCA AAA TCT GTA GGT |
| rCxcl10     | GGG ATC CCT CTC GCA AGA A      | CTC AGC GTC TGT TCA TGG AAG T   |
| rGapdh      | GAA CGG GAA GCT CAC TGG C      | GCA TGT CAG ATC CAC AAC GG      |
| rIfnb1      | TGG AAG GCT CAA CCT CAG CTA    | GGG TGC ATC ACC TCC ATA GG      |
| rIgf1       | AGA CGG GCA TTG TGG ATG A      | ACA TCT CCA GCC TCC TCA GAT C   |
| rIl10       | CCC AGA AAT CAA GGA GCA TTT G  | CAG CTG TAT CCA GAG GGT CTT CA  |
| rIl1b       | GAA ACA GCA ATG GTC GGG AC     | AAG ACA CGG GTT CCA TGG TG      |
| rIl27       | GCT GCG CAG GGA ATT CAC        | CCC TGA ACC TCA GAG AGC AGT T   |
| rIl6        | GTT GTG CAA TGG CAA TTC TGA    | TCT GAC AGT GCA TCA TCG CTG     |
| rLcn2       | GGG CAG GTG GTT CGT TGT C      | AGC GGC TTT GTC TTT CTT TCT G   |
| rNos2       | CTC AGC ACA GAG GGC TCA AAG    | TGC ACC CAA ACA CCA AGG T       |
| rS100a10    | GCC ATC CCA AAT GGA GCA T      | CCC CTG CAA ACC TGT GAA AT      |
| rS100b      | GAG CAG GAA GTG GTG GAC AAA    | CAC TCC CCA TCC CCA TCT T       |
| rSerp1g1    | GAC AGC CTG CCC TCT GAC A      | GCA CTC AAG TAG ACG GCA TTG A   |
| rStat3      | CCG GCC CTT AGT CAT CAA GA     | TTG ACC AGC AAC CTG ACT TTT G   |
| rTgfb       | AAA CGG AAG CGC ATC GAA        | TGG CGA GCC TTA GTT TGG A       |
| rTimp1      | CGC AGC GAG GAG TTT CTC AT     | GGC AGT GAT GTG CAA ATT TCC     |
| rTnf        | AGC CCT GGT ATG AGC CCA TGT A  | CCG GAC TCC GTG ATG TCT AAG T   |
| rTrem2      | CCA AGG AGC CAA TCA GGA AA     | GGC CAG GAG GAG AAG AAT GG      |

**Table S2. Antibody list**

| <b>Target</b>    | <b>Host</b> | <b>Dilution</b> | <b>Company</b>                               | <b>RRID</b>      |
|------------------|-------------|-----------------|----------------------------------------------|------------------|
| Iba1             | rabbit      | 1:500           | WAKO Pure Chemical Corporation, Osaka, Japan | RRID: AB_839504  |
| iNos             | goat        | 1:250           | Abcam, Cambridge, UK                         | RRID: AB_301857  |
| Gfap             | chicken     | 1:1000          | Abcam, Cambridge, UK                         | RRID:AB_304558   |
| hC3d             | rabbit      | 1:300           | Agilent, Santa Clara, CA, USA                | RRID:AB_578478   |
| Lcn2             | goat        | 1:100           | R and D Systems, Minneapolis, MN, USA        | RRID:AB_355022   |
| APP              | rabbit      | 1:200           | Thermo Fisher Scientific, Waltham, MA, USA   | RRID:AB_2533902  |
| Pdgfra           | goat        | 1:250           | R and D Systems, Minneapolis, MN, USA        | RRID:AB_2236897  |
| Ki67             | rabbit      | 1:250           | Abcam, Cambridge, UK                         | RRID:AB_302459   |
| Sox10            | rabbit      | 1:100           | DCS Immunoline, Hamburg, Germany             | RRID: AB_2313583 |
| APC (CC1)        | mouse       | 1:300           | Sigma-Aldrich, St. Louis, MO, USA            | RRID:AB_2057371  |
| Bcas1            | mouse       | 1:200           | Santa Cruz; Dallas, TX, USA                  | RRID:AB_10839529 |
| Clec7a (Dectin1) | rat         | 1:50            | InvivoGen San Diego, CA, USA                 | RRID:AB_2753143  |
| CD74             | rat         | 1:200           | Biolegend, San Diego, CA, USA                | RRID:AB_2566502  |
| Iba1             | chicken     | 1:500           | Aves Labs, Davis, CA, USA                    | RRID:AB_2910556  |
| Tmem119          | rabbit      | 1:100           | Abcam, Cambridge, UK                         | RRID:AB_2921338  |
| CD3              | rabbit      | 1:400           | Agilent, Santa Clara, CA, USA                | RRID:AB_2335677  |
| MBP              | rat         | 1:300           | Biorad, Hercules, CA, USA                    | RRID:AB_325004   |
